# Supplementary figures and images for: Sperm-specific COX6B2 enhances oxidative phosphorylation, proliferation, and survival in human lung adenocarcinoma
Source: eLife journal article supplement (doi:10.7554/elife.58108), 2020-09-29

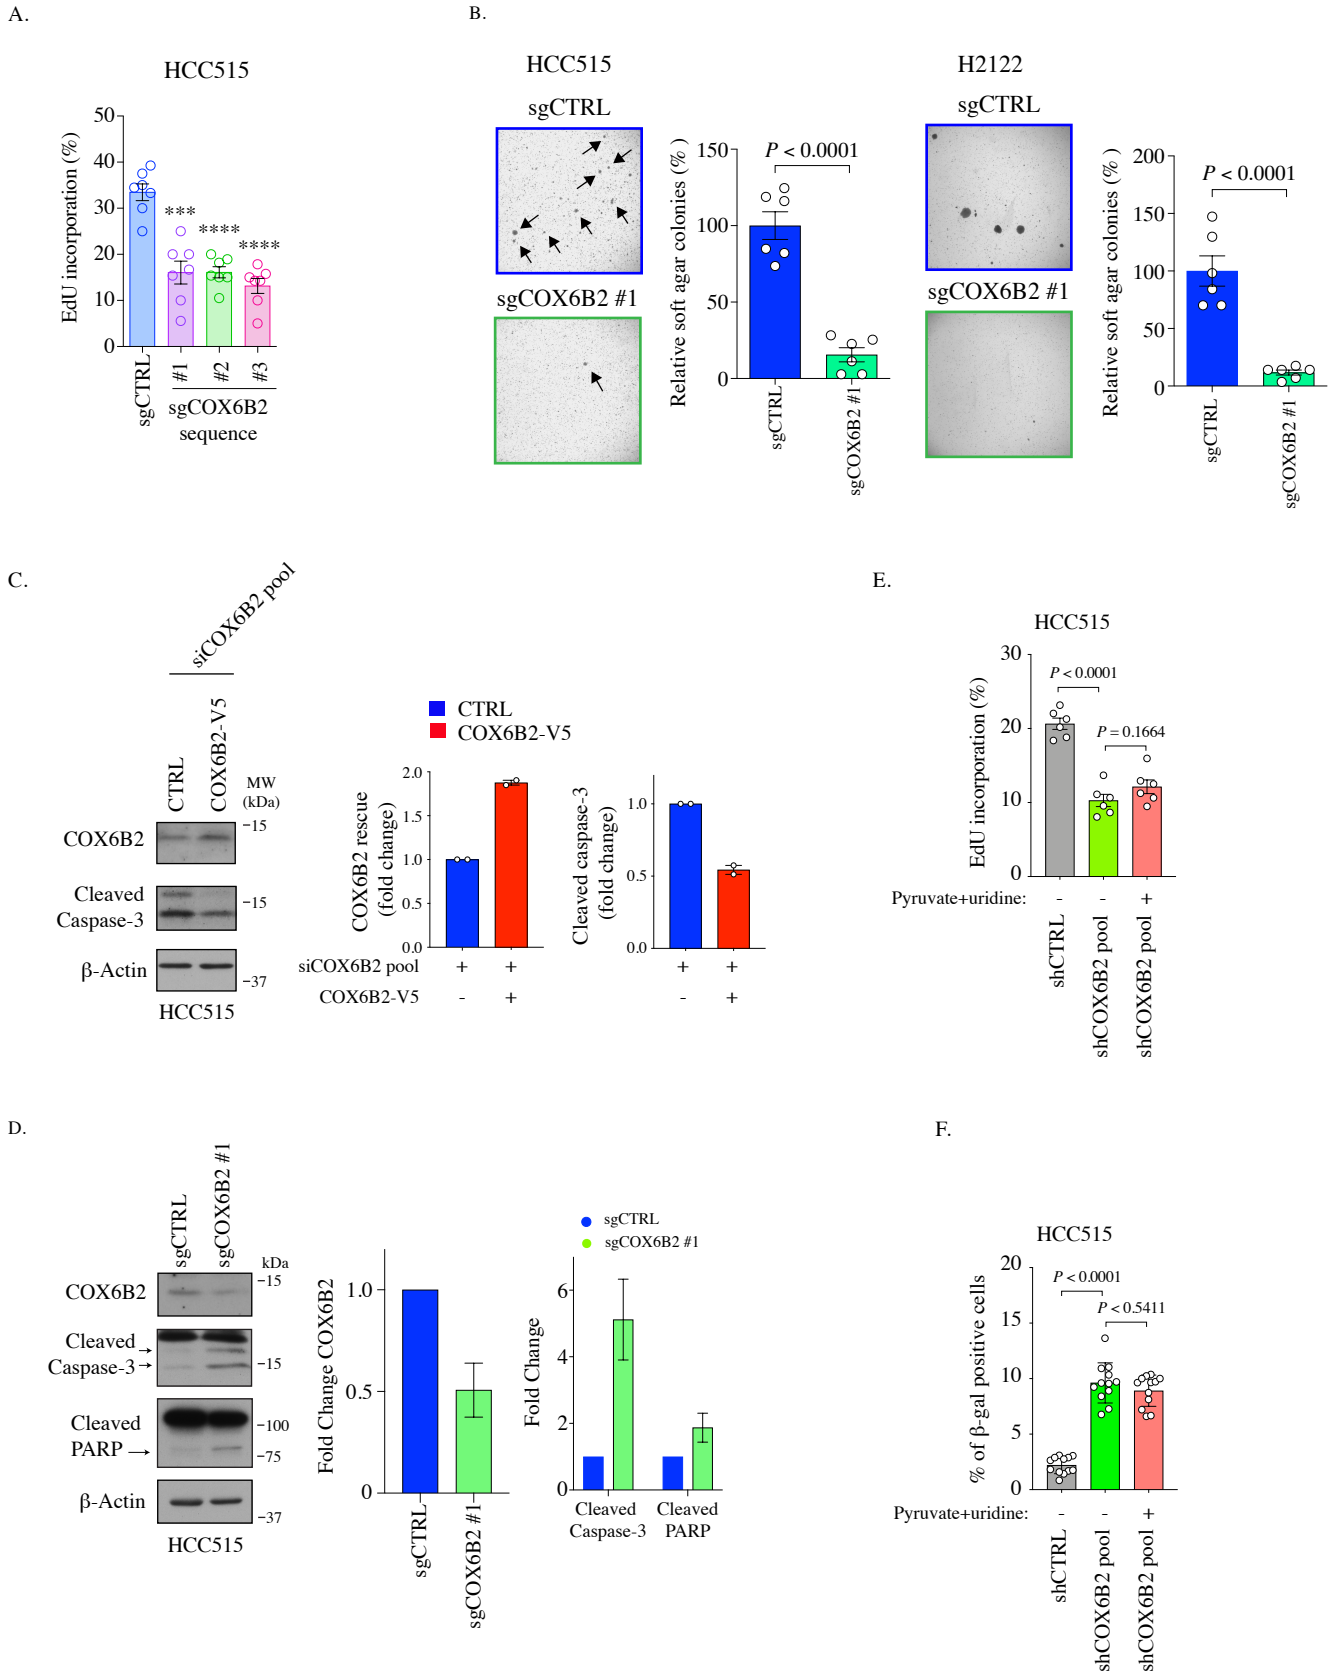

Supplement: supp [file elife-58108-supp-v1.zip]

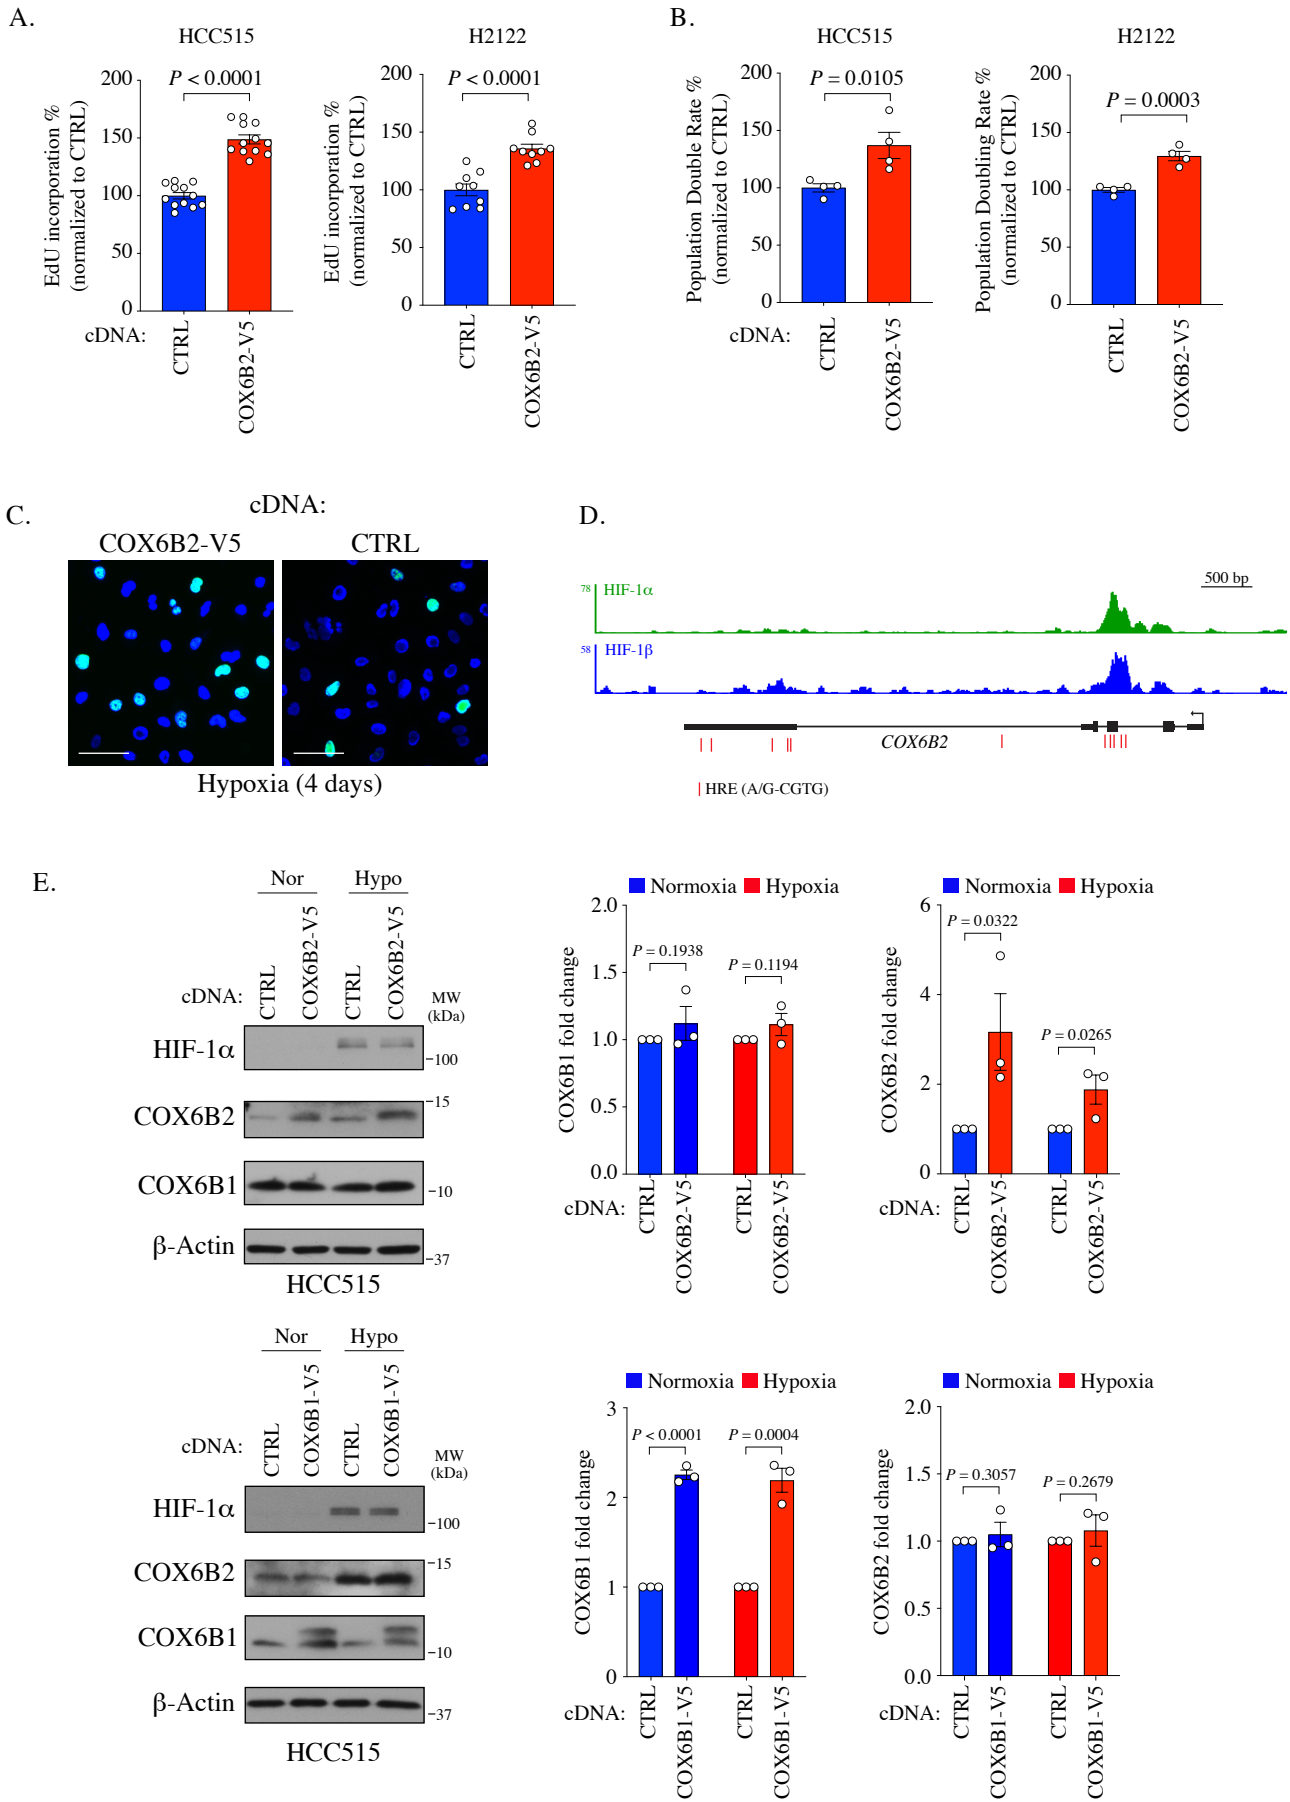

Supplement: supp [file elife-58108-supp-v1.zip]

A.

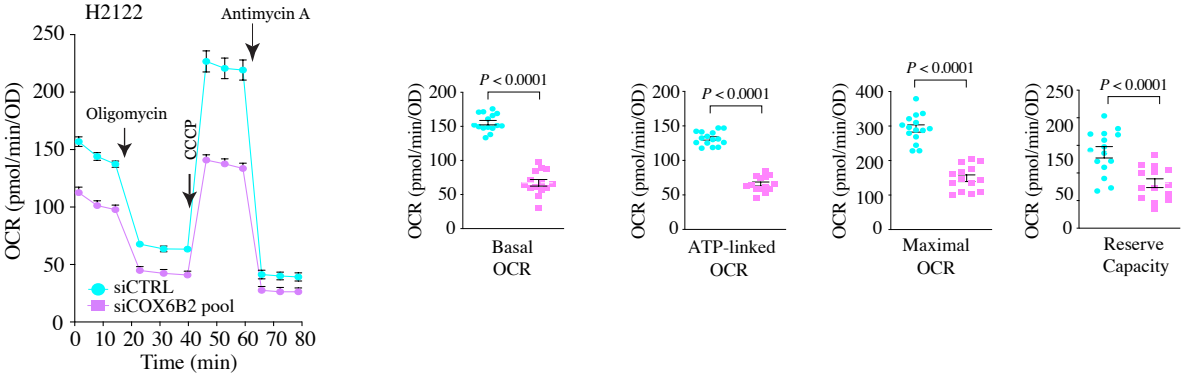

B.

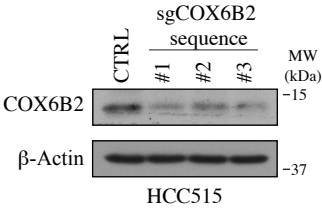

C.

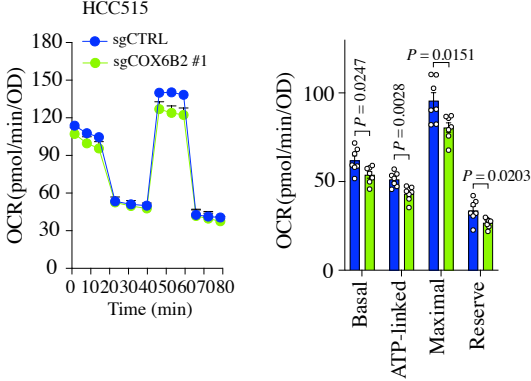

Supplement: supp [file elife-58108-supp-v1.zip]

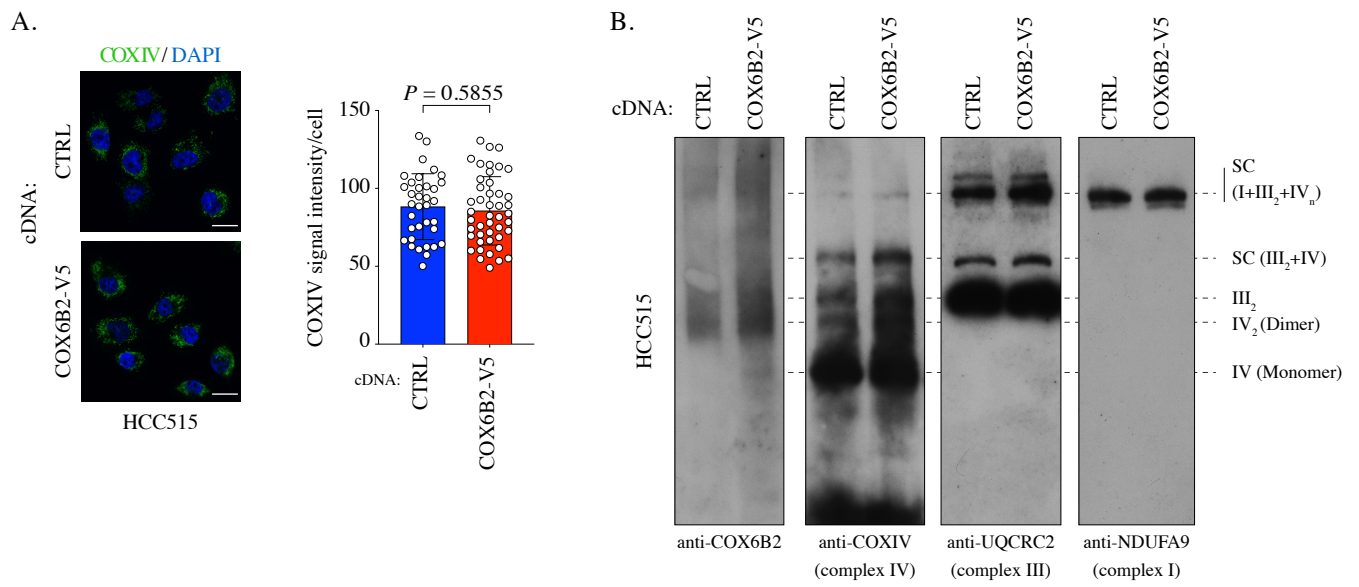

Supplement: supp [file elife-58108-supp-v1.zip]

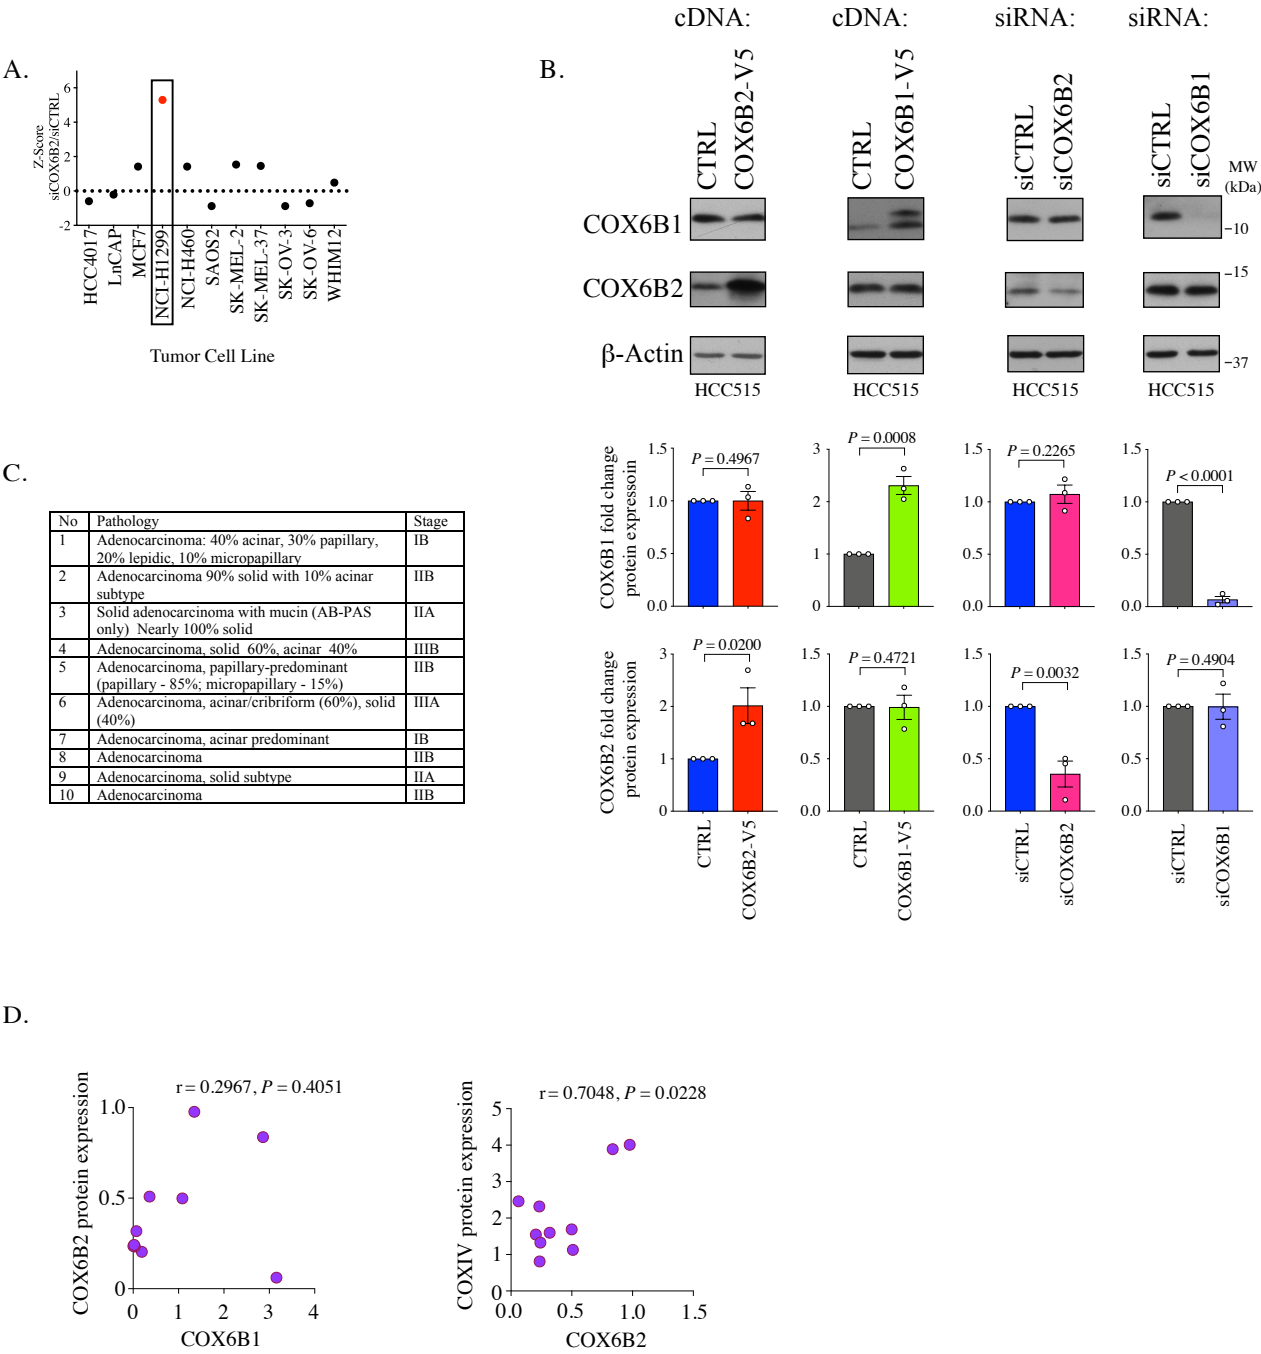

Supplement: supp [file elife-58108-supp-v1.zip]
